# Supplementary material for: Expanding Occupational Health, Safety, and Well-Being Education in Undergraduate Curriculums
Source: Preprints.org preprint supplement (doi:10.20944/preprints202401.1271.v1), 2024-01-17
Supplement: Supplementary file 3 [file Table S2.docx]

**Table S2.** Opportunities for integrating OSH and well-being content into an Exercise Science/Kinesiology curriculum.

| **Class** | **Explanation** | **Potential OSH and Well-being  Content** |
| --- | --- | --- |
| Introductory or Overview Classes (i.e., Physical Activity for Health) | Most undergraduate exercise science and kinesiology programs have at least one course that overviews the main tenets of the discipline. | A discussion of physical (in)activity in society can discuss the amount of time people spend at work in jobs that may be predominantly seated or rely on heavy occupational physical activity. |
| Biomechanics | Depending on the school, exercise science and kinesiology may have a course that looks at this topic and provides an overview of human kinematics, kinetics, and functional anatomy. | Examples from a variety of tasks and injuries can be provided. Sports or exercise examples can be paired with a similar task in the workplace. For example, the repetitive nature of rowing can be compared with the repetitive nature of manual materials handling. Many “tactical athlete” examples (e.g., military, firefighter, paramedic[47]) may interest students and can be discussed. |
| Environmental Physiology | Environmental Physiology plays a role in workplace health, especially discussing the effects of temperature and gravity (for example) on worker well-being. This course would build on the human physiology courses in these programs. | Examples of exercising in the heat or cold could be expanded to the human physiology of working in the heat and cold. |
| Public Health-related classes | Exercise Science and Kinesiology programs are often offered in the same Department or College as Public Health. While Exercise Science and Kinesiology programs may predominantly have classes that focus on the individual, Public Health focuses on entire populations. | If there is capacity, an Introduction to Public Health course can be an elective or required as part of the Exercise Science degree, emphasizing how the individual is part of a larger system. Conversely, Exercise Science courses can include sections on how Social Determinants of Health can impact an individual and curate examples related to the class comment (i.e., the role a person’s job plays in health outcomes). |
| Workplace health for future healthcare workers | The flexibility of many exercise science and kinesiology programs allows students to obtain the electives required for a variety of post-graduate education paths[48]. This course would expand the “Health in the Workplace” class, geared towards students pursuing healthcare degrees. | This course would have very specific content related to the impact of healthcare worker well-being on patient well-being and relevant occupational-specific issues. Students could conduct research projects on their field of interest to increase awareness and reflect on how knowing this information can help prepare them for their future career. |
